# Supplementary material for: Quality Control and Authentication of Argan Oils: Application of Advanced Analytical Techniques
Source: MDPI journal article supplement (doi:10.3390/molecules28041818), 2023-02-15
Supplement: s1 [file s1]

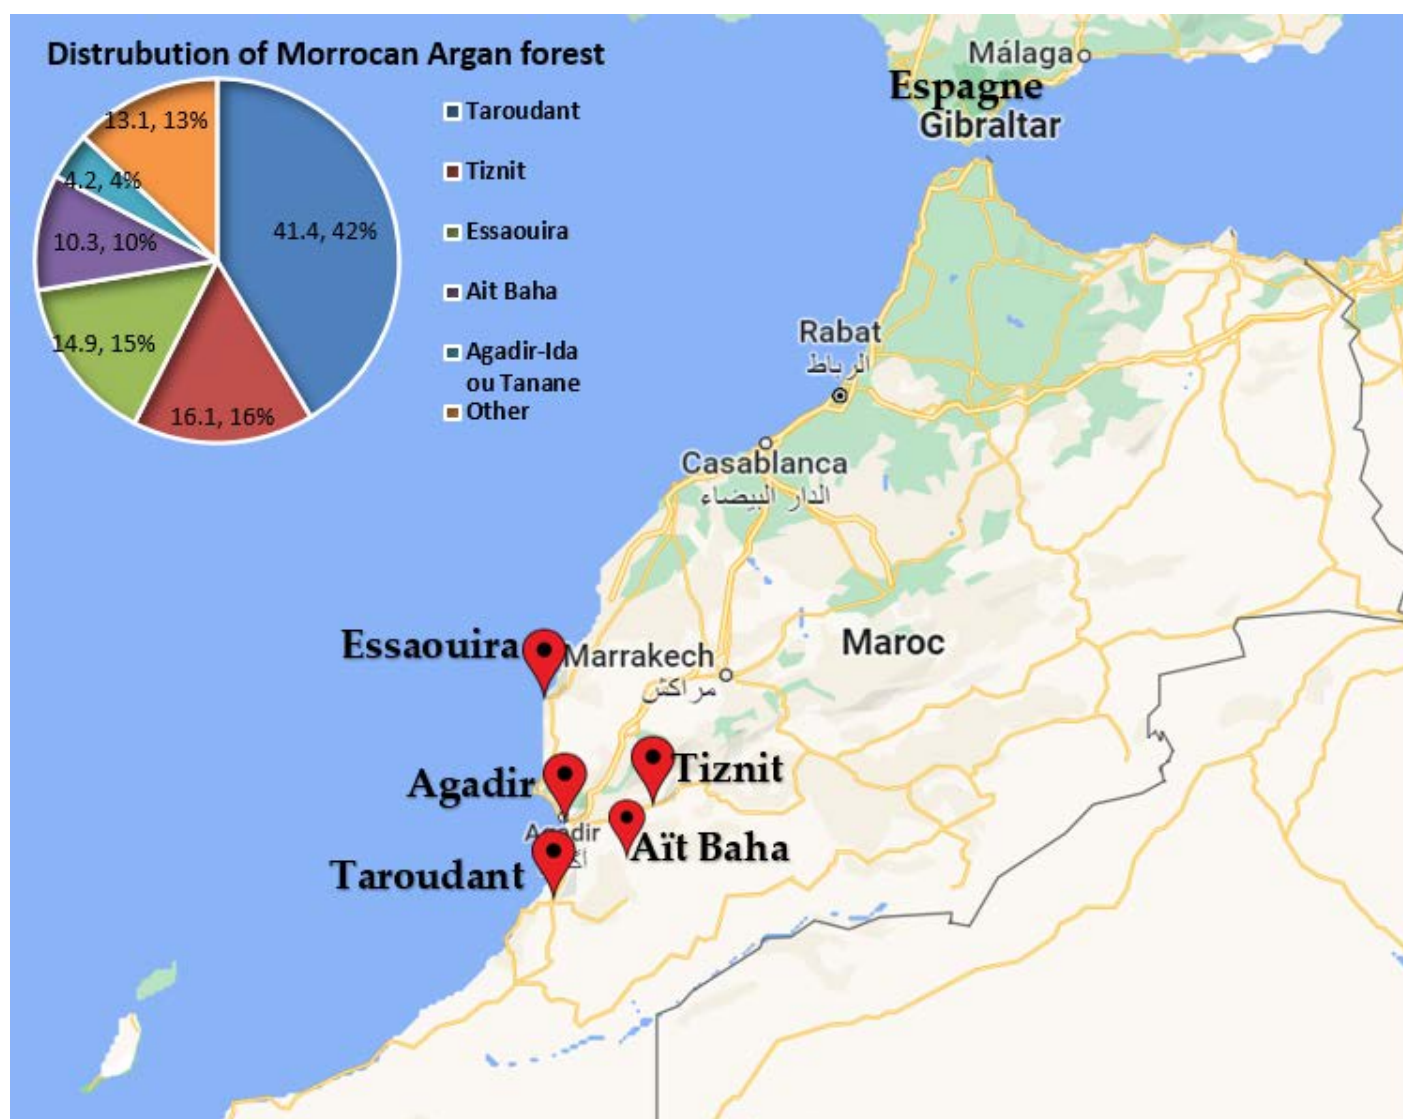

**Figure S1.** The Moroccan Argan tree regions (distribution based on [1]).

**Table S1** Percentages of total fatty acids in Argan oil according to different research studies. NA: not applicable.

| Extraction technique         | Origin of oil | Fatty acids |             |             |            |             | References |
|------------------------------|---------------|-------------|-------------|-------------|------------|-------------|------------|
|                              |               | Oleic       | Palmitic    | Linoleic    | Stearic    | Linolenic   |            |
|                              |               | C18:1       | C16:0       | C18:2       | C18:0      | C18:3       |            |
| Traditional                  | NA            | 43.0 - 49.1 | 11.5 - 15.0 | 29.3 - 36.0 | 4.3-7.2    | ≤0.3        | [85]       |
|                              | Agadir        | 44.9 ± 0.5  | 12.7 ± 0.4  | 30.5 ± 0.7  | 34.1 ± 0.6 | 0.13 ± 0.13 |            |
|                              | Ait-Baha      | 46.8 ± 0.5  | 14.1 ± 0.4  | 33.1 ± 0.5  | 6.8 ± 0.3  | 0.29 ± 0.04 |            |
| Mechanical                   | Ait-Baha      | 43.9 ± 0.5  | 14.1 ± 0.4  | 30.3 ± 0.8  | 4.6 ± 0.2  | 0.11 ± 0.03 | [20]       |
|                              | Taroudant     | 48.6 ± 0.5  | 14.6 ± 0.3  | 35.4 ± 0.6  | 5.6 ± 0.3  | 0.26 ± 0.02 |            |
|                              | Tiznit        | 47.3 ± 0.7  | 13.8 ± 0.4  | 34.1 ± 0.6  | 6.9 ± 0.3  | 0.25 ± 0.04 |            |
| Traditional                  | NA            | 45.0 - 50.0 | 11.8 - 13.5 | 29.1 - 34.1 | 5.2 - 6.9  | 0.03 - 0.1  | [86]       |
| Traditional                  | Tindouf       | 45.1        | 2.0         | 35.9        | 6.2        | Traces      | [6]        |
| NA                           | Taroudant     | 47.2 ± 1.5  | 15.4 ± 0.7  | 30.3 ± 1.5  | 5.9 ± 0.5  | NA          | [87]       |
| Mechanical                   | Ait Baha,     | 48          | 13.0        | 32.0        | 5.0        | NA          | [71]       |
| Traditional                  | Tidzi, Tiout  | 47          | 13.0        | 33.0        | 5.0        | NA          |            |
| Mechanical                   | Agadir        | 46.8 ± 0.5  | 12.8 ± 0.3  | 33.8 ± 0.6  | 4.9 ± 0.2  | 0.2 ± 0.05  | [75]       |
| EVAO regulation limit values |               | 43.0 - 49.0 | 11.5 - 15.0 | 29.3 - 36.0 | 4.3 - 7.2  | ≤0.2        | [46]       |

**Table S2** Metal composition of Argan Oils determined by ICP-AES. BQL: Below Quantification Limit, NA: not applicable.

| Metal content (mg/kg) |                  |                  |                |                  |                |                  |                  | Origins  | Extraction methods     | References |
|-----------------------|------------------|------------------|----------------|------------------|----------------|------------------|------------------|----------|------------------------|------------|
| Ca                    | Co               | Cr               | Fe             | K                | Mg             | Cd               | Zn               |          |                        |            |
| 11.70<br>± 0.03       | 0.550<br>± 0.006 | 0.015<br>± 0.003 | NA             | 0.620<br>± 0.007 | 5.95<br>± 0.06 | 0.100<br>± 0.003 | 0.650<br>± 0.003 | Agadir   | Mechanical extraction  | [44]       |
|                       |                  |                  |                |                  |                |                  |                  | Tarouda  |                        |            |
| 11.10<br>± 0.03       | 0.390<br>± 0.003 | 0.011<br>± 0.003 | NA             | 1.110<br>± 0.004 | 7.62<br>± 0.03 | 0.170<br>± 0.003 | 0.400<br>± 0.003 | nt       |                        |            |
|                       |                  |                  |                |                  |                |                  |                  | Essaouir |                        |            |
| 8.00<br>± 0.01        | 0.410<br>± 0.003 | 0.024<br>± 0.003 | NA             | 0.420<br>± 0.008 | 4.33<br>± 0.06 | 0.14<br>± 0.01   | 0.530<br>± 0.003 | a        |                        |            |
| 25.0 - 65.5           | 0.1 – 0.5        | 1.0 – 3.0        | 3.0 ± 1.0      | 8.6 - 11.7       | 2.2 – 18.0     | <0.26            | <0.23            | Morocco  | Traditional extraction | [46]       |
| 10.0<br>± 0.1         | NA               | BQL              | 0.46<br>± 0.01 | 0.51<br>± 0.01   | 2.43<br>± 0.03 | 0.11<br>± 0.01   | 0.036<br>± 0.010 | Agadir   | Traditional extraction | [45]       |
|                       |                  |                  |                |                  |                |                  |                  | Tarouda  |                        |            |
| 9.8<br>± 0.1          | NA               | BQL              | 0.18<br>± 0.01 | 0.43<br>± 0.01   | 6.32<br>± 0.05 | 0.13<br>± 0.01   | 0.033<br>± 0.010 | nt       |                        |            |
|                       |                  |                  |                |                  |                |                  |                  | Essaouir |                        |            |
| 6.7<br>± 0.1          | NA               | BQL              | 0.32<br>± 0.01 | 0.32<br>± 0.01   | 2.82<br>± 0.02 | 0.12<br>± 0.01   | 0.043<br>± 0.010 | a        |                        |            |
| 7.4<br>± 0.9          | NA               | BQL              | 0.67<br>± 0.05 | 1.11<br>± 0.01   | 2.28<br>± 0.23 | BQL              | BQL              | Tiznit   | Traditional extraction | [88]       |
